1 Identification, characterization, and application of a highly sensitive lactam biosensor from

2 *Pseudomonas putida*

3 Mitchell G. Thompson<sup>1,2,3</sup>, Allison N. Pearson<sup>1,2</sup>, Jesus F. Barajas<sup>2,4</sup>, Pablo Cruz-Morales<sup>1,2,5</sup>,

4 Nima Sedaghatian<sup>1,2</sup>, Zak Costello<sup>1,2,6</sup>, Megan E. Garber<sup>1,2,7</sup>, Matthew R. Incha<sup>1,2,3</sup>, Luis E.

5 Valencia<sup>1,2,8</sup>, Edward E. K. Baidoo<sup>1,2</sup>, Hector Garcia Martin<sup>1,2,6,9</sup>, Aindrila Mukhopadhyay<sup>1,2,7</sup>,

6 Jay D. Keasling<sup>1,2,8,10,11,12</sup>

7 <sup>1</sup>Joint BioEnergy Institute, 5885 Hollis Street, Emeryville, CA 94608, USA.

8 <sup>2</sup>Biological Systems & Engineering Division, Lawrence Berkeley National Laboratory, Berkeley,

9 CA 94720, USA.

10 <sup>3</sup>Department of Plant and Microbial Biology, University of California, Berkeley, CA 94720,

11 USA

12 <sup>4</sup>Department of Energy Agile BioFoundry, Emeryville, California, USA

13 <sup>5</sup>Centro de Biotecnología FEMSA, Instituto Tecnológico y de Estudios superiores de Monterrey,

14 Mexico

15 <sup>6</sup>DOE Agile BioFoundry, Emeryville, CA, USA

16 <sup>7</sup>Comparative Biochemistry Graduate Group, University of California, Berkeley, Berkeley,

17 California, USA

18 <sup>8</sup>Joint Program in Bioengineering, University of California, Berkeley/San Francisco, CA 94720,

19 USA

20 <sup>9</sup>BCAM, Basque Center for Applied Mathematics, Bilbao, Spain

21 <sup>10</sup>Department of Chemical and Biomolecular Engineering, University of California, Berkeley,

22 CA 94720, USA

23 <sup>11</sup>The Novo Nordisk Foundation Center for Biosustainability, Technical University of Denmark,

24 Denmark

25 <sup>12</sup>Center for Synthetic Biochemistry, Institute for Synthetic Biology, Shenzhen Institutes for

26 Advanced Technologies, Shenzhen, China

27

## 28 **ABSTRACT**

29 Caprolactam is an important polymer precursor to nylon traditionally derived from  
30 petroleum and produced on a scale of 5 million tons per year. Current biological pathways for  
31 the production of caprolactam are inefficient with titers not exceeding 2 mg/L, necessitating  
32 novel pathways for its production. As development of novel metabolic routes often requires  
33 thousands of designs and results in low product titers, a highly sensitive biosensor for the final  
34 product has the potential to reduce development time. Here we report a highly sensitive  
35 biosensor for valerolactam and caprolactam from *Pseudomonas putida* KT2440 which is >1000x  
36 more sensitive to exogenous ligand than previously reported sensors. Manipulating the  
37 expression of the sensor *opIR* (PP\_3516) substantially altered the sensing parameters, with  
38 various vectors showing  $K_d$  values ranging from 700 nM to 1.2 mM. Our most sensitive  
39 construct was able to detect *in vivo* production of caprolactam above background at 11  $\mu\text{g/L}$ . The  
40 high sensitivity and range of OplR is a powerful tool towards the development of novel routes to  
41 the biological synthesis of caprolactam.

42

## 43 **INTRODUCTION**

44 Caprolactam is an important chemical precursor to the polymer nylon 6, with a global  
45 demand approximately 5 million tons per year <sup>1</sup>. Currently the majority of caprolactam is

46 synthesized from cyclohexanone, which is derived from petroleum <sup>2</sup>. In addition to being  
47 inherently unsustainable, the chemical process to synthesize caprolactam requires toxic reagents  
48 and produces unwanted byproducts such as ammonium sulfate <sup>2</sup>. Multiple attempts have been  
49 made to produce caprolactam biologically, however the highest titers achieved to date are no  
50 greater than 1-2 mg/L <sup>1,3</sup>. All current published strategies to produce caprolactam rely on the  
51 cyclization of 6-aminocaproic acid (6ACA) via a promiscuous acyl-coA ligase <sup>1,3</sup>. While similar  
52 strategies to make C4 butyrolactam and C5 valerolactam produce gram per liter titers, it is  
53 thought that both the entropy and enthalpy properties of 7-membered ring formation of  
54 caprolactam present an inherent barrier to the cyclization of 6ACA <sup>4,5</sup>. Clearly, novel routes to  
55 renewable biological production of caprolactam are needed.

56 Genetically encoded biosensors can accelerate metabolic engineering efforts in many  
57 ways, the foremost of which is the ability to rapidly screen for desirable phenotypes beyond the  
58 throughput of analytical chemistry <sup>6</sup>. Multiple papers have reported transcription factors or  
59 riboswitches that respond to lactams with varying degrees of sensitivity and specificity <sup>4,7,8</sup>. One  
60 feature that unifies currently available lactam biosensors is that lactams are not the native ligand  
61 for any of the corresponding biosensor systems. Zhang et al. used ChnR from *Acinetobacter* sp.  
62 Strain NCIMB 9871 to sense multiple lactams with all ligands having a  $K_d$  of > 30 mM.  
63 However, ChnR natively regulates cyclohexanol catabolism and is activated by its natural ligand,  
64 cyclohexanone, at sub-millimolar concentrations <sup>9,10</sup>. Yeom et al. selected mutants of the NitR  
65 biosensor to sense caprolactam at concentrations as low as 100  $\mu$ M when added exogenously,  
66 and leveraged this sensor to identify novel cyclases to convert 6ACA to caprolactam <sup>8</sup>. Natively,  
67 NitR regulates nitrile catabolism in *Rhodococcus rhodochrous* J1, and is responsive to  
68 micromolar concentrations of isovalernitrile <sup>11,12</sup>. Therefore, it is reasonable to assume that if

69 natural lactam catabolic pathways are identified, highly sensitive biosensors could also be  
70 found.

71 Recently, two groups have identified pathways of lactam degradation in both *P. putida*  
72 and *Pseudomonas jessenii*<sup>13,14</sup>. Work in *P. putida* demonstrated that the enzyme OplBA,  
73 putatively responsible for the hydrolysis of valerolactam, is upregulated by the lactam but not its  
74 cognate  $\omega$ -amino acid<sup>14</sup>. These findings suggest there may be a lactam-sensitive transcription  
75 factor controlling the expression of the hydrolytic enzyme that can be used as a biosensor. In this  
76 work we demonstrate that the AraC-type regulator directly downstream of *oplBA* is indeed a  
77 lactam biosensor with unprecedented sensitivity towards both valerolactam and caprolactam.  
78 Through rational engineering we developed a suite of lactam sensing plasmids with dissociation  
79 constants ranging from 700 nM to 1.2 mM, allowing for a dramatic dynamic range of sensing.  
80 To demonstrate the utility of these sensors, we show that they are able to detect low titers of  
81 caprolactam produced biologically in an *Escherichia coli* system.

## 82 **RESULTS**

### 83 Identification and development of *oplR* as a lactam biosensor

84 In *P. putida*, the *oplBA* locus is flanked by the LysR-family regulator PP\_3513 upstream,  
85 and the AraC-family regulator PP\_3516 downstream. To infer if either of these transcription  
86 factors regulates *oplBA*, we used publicly available fitness data to assess if either regulator is  
87 cofit with *oplBA* (<http://fit.genomics.lbl.gov>)<sup>15</sup>. While no cofitness was observed between  
88 PP\_3513 and either *opIA* or *opIB*, PP\_3516 was highly cofit with both genes (0.91:PP\_3514,  
89 0.80:PP\_3515). To examine the hypothesis that PP\_3516 is the regulator of *oplBA*, we examined  
90 the genomic contexts of the oxoprolinase loci across multiple bacteria (Figure 1). While both  
91 regulators were found in closely related species, in more distantly related *Pseudomonads*, such as

92 *Pseudomonas aeruginosa*, only the AraC-family regulator is conserved (Figure 1). Using  
 93 Multiple EM for Motif Elicitation (MEME)<sup>16</sup> we attempted to identify conserved putative  
 94 binding sites upstream of *oplBA* as well as PP\_3516. In closely related *Pseudomonads*, including  
 95 *P. aeruginosa*, a conserved motif was identified upstream of both *oplBA* as well PP\_3516  
 96 (Figure 1). Attempts to confirm this as the binding site of PP\_3516 were hampered by the  
 97 insolubility of PP\_3516 when expressed heterologously (Figure S1), a common issue with AraC-  
 98 family proteins<sup>17,18</sup>.

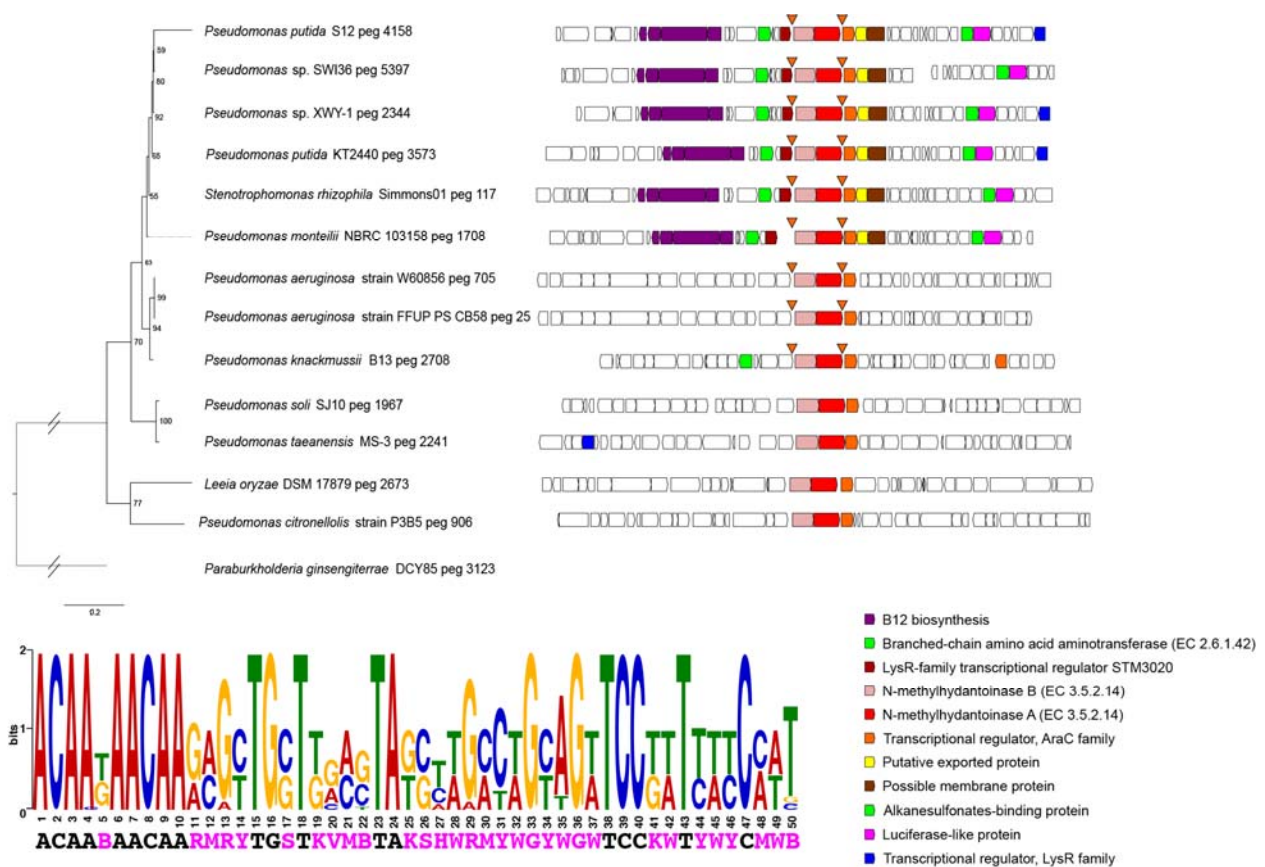

99  
 100 **Figure 1 - Synteny analysis of *oplBA* homologs across genomes of related species. Triangles**  
 101 **show the location of conserved putative binding sites of OplR. A consensus putative OplR**  
 102 **binding site is shown below.**

103           In order to screen the ability of PP\_3516 to sense lactams, we employed a two-plasmid  
104 test system wherein PP\_3516 was cloned into an arabinose inducible medium-copy p15a plasmid  
105 and the 200-bp upstream of *opIB* (Figure 2A) was cloned upstream of RFP on a compatible  
106 medium-copy pBBR plasmid (Figure 2B). The relationship between fluorescence output, *opIR*  
107 expression, and ligand induction was tested via a checkerboard assay where the levels of  
108 arabinose and valerolactam were varied independently of one another in cultures of *E. coli* that  
109 harbored both the “reporter” and “regulator” plasmids. A dose-dependent expression of RFP was  
110 observed; both arabinose and valerolactam were required for high-level expression of RFP  
111 (Figure 2C). Our initial screen also showed that the fluorescence was far above background RFP  
112 expression even at the lowest concentration of valerolactam tested (10  $\mu$ M).

113           To quantify the sensing properties of PP\_3516 the regulator was induced with a fixed  
114 concentration of arabinose at 0.0125% w/v and concentrations of either valerolactam or  
115 caprolactam were varied from 1 mM to 12 nM (Figure 2D). PP\_3516 proved to be extremely  
116 sensitive to both caprolactam and valerolactam, with both ligands having a  $K_d \sim 5$   $\mu$ M and limits  
117 of detection  $\leq 12$  nM (Table 1). Based on these findings we propose PP\_3516 be named *opIR* for  
118 oxoprolinase regulator, which encodes a biosensor  $\sim 5000$ x more sensitive towards caprolactam  
119 than the next most sensitive published biosensor<sup>8</sup>.

120

121

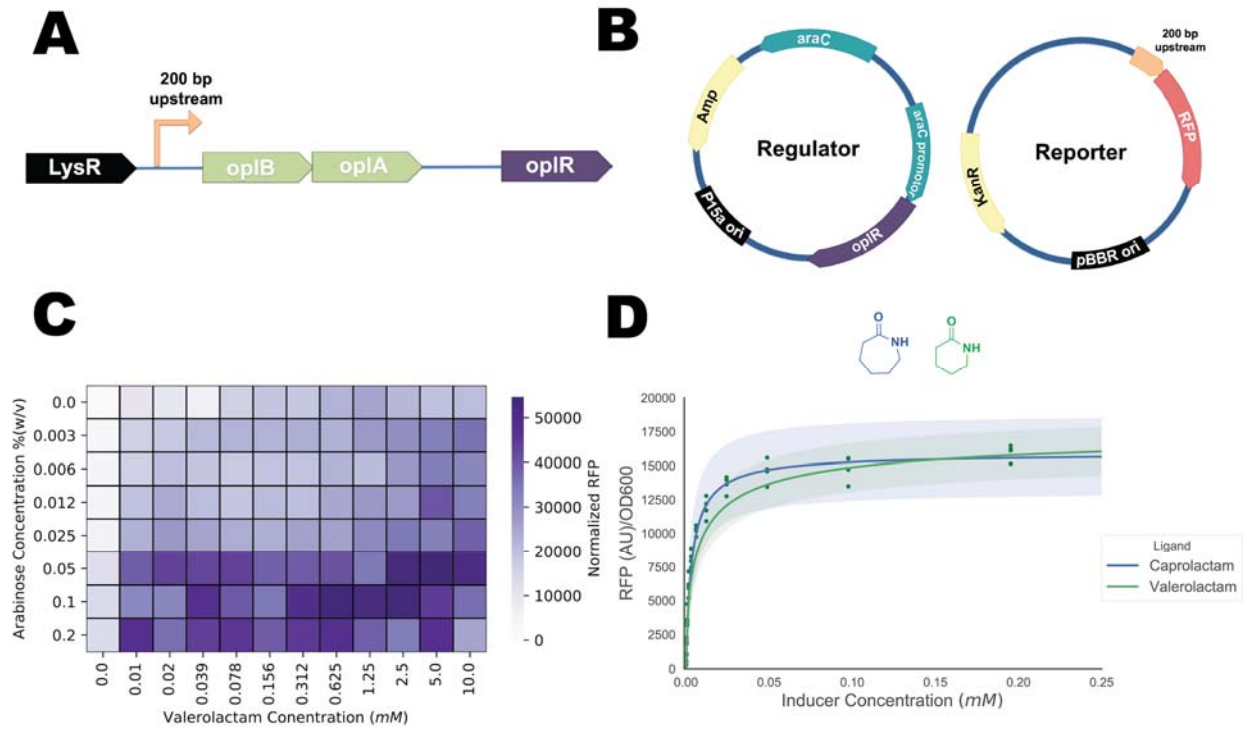

122

123 **Figure 2 - Development of an *oplR*-based lactam biosensor. A) Operonic structure of *oplBA***

124 **relative to *oplR* and putative promoter region used to construct the reporter. B) Diagram of**

125 **the two-plasmid system used to test OplR lactam sensing C) Checkerboard screen of OplR**

126 **biosensor two-plasmid system. Y-axis shows the concentration of arabinose (%w/v), X-axis**

127 **shows the concentration of valerolactam (mM). Colorbar to right shows fluorescent**

128 **intensity normalized to OD<sub>600</sub>. D) Fluorescence data fit to the Hill equation to derive**

129 **biosensor performance characteristics for valerolactam and caprolactam. Points represent**

130 **individual measurements. Shaded area represents (+/-) one standard deviation, n=4.**

131

132 **Table 1 - Two-plasmid biosensor parameters with caprolactam and valerolactam as**

133 **ligands. Max: Predicted maximal RFP, Hill Coef: Predicted Hill coefficient, K<sub>d</sub>: Predicted**

134 **K<sub>d</sub> in mM. LoD: Limit of detection determined experimentally. Standard deviation**

135 **estimates are in parentheses.**



| Ligand       | Max         | Hill Coef   | K <sub>d</sub> (mM) | LoD (mM)   |
|--------------|-------------|-------------|---------------------|------------|
| Valerolactam | 17817 (414) | 0.62 (0.05) | 0.007 (0.001)       | ≤ 0.000012 |
| Caprolactam  | 15943 (483) | 0.94 (0.16) | 0.004 (0.001)       | ≤ 0.000012 |

136

### 137 Development of One Plasmid Systems

138 As a two-plasmid system is not convenient for engineering biological systems, we then  
139 sought to consolidate both the reporter and regulator into a single vector. Initial screening of  
140 OplR in the checkerboard assay suggested that varying the level of expression of OplR could  
141 dramatically influence the resulting sensing properties of the system (Figure 2C). We therefore  
142 constructed a family of plasmids, pLACSENS, where *oplR* was constitutively expressed from  
143 five promoters of increasing strength divergent from the RFP reporter (Figure 3A).

144 Biosensor performance of pLACSENS vectors was then assessed using valerolactam as a  
145 ligand across concentrations from 12.5 mM to 12.5 nM Figure (Figure 3B). As seen in the two-  
146 plasmid system, varying the strength of *oplR* expression dramatically changed the characteristics  
147 of the biosensor (Table 2). The most sensitive vector, pLACSENS3, had an experimentally  
148 determined limit of detection (LoD) of ≤12 nM, and a K<sub>d</sub> of 700 nM. The least sensitive vector,  
149 pLACSENS5, had a limit of detection of 1.5 μM, and a K<sub>d</sub> of 1.5 mM, but drives the expression  
150 of *oplR* with the strongest predicted promoter. The maximal RFP expression also varied greatly  
151 with *oplR* expression, with the highest and lowest RFP expression observed in pLACSENS3 and  
152 pLACSENS5, respectively (26300 vs. 793 RFP (AU)/OD<sub>600</sub>). Induction over background  
153 expression was also highly variable; pLACSENS1 and pLACSENS4 were both maximally  
154 induced at ~250x over background, while pLACSENS5 was only induced ~25x over  
155 background.



156           Given the wide range of biosensing parameters within the pLACSENS vectors, we  
157 sought to characterize which ligand concentration ranges each vector is most suited to detect. To  
158 do this, we utilized a recently developed model to probabilistically relate inducer concentration  
159 and fluorescence data via Markov Chain Monte Carlo (MCMC) sampling<sup>19</sup>. A resolution  
160 window is defined as the concentrations of inducer that are statistically compatible with the  
161 fluorescence data fit to the Hill function at a 95% confidence interval (cI). Resolution windows  
162 for each pLACSENS plasmid were graphed from their experimentally determined LoD to ligand  
163 concentrations compatible with 75% maximal fluorescence (Figure 3C). Overall, the family of  
164 vectors showed resolution from 5 nM to 1 mM valerolactam, with pLACSENS3 having the  
165 highest resolution at the lowest concentrations and pLACSENS5 having the best resolution at  
166 high concentrations (Figure 3C).

167

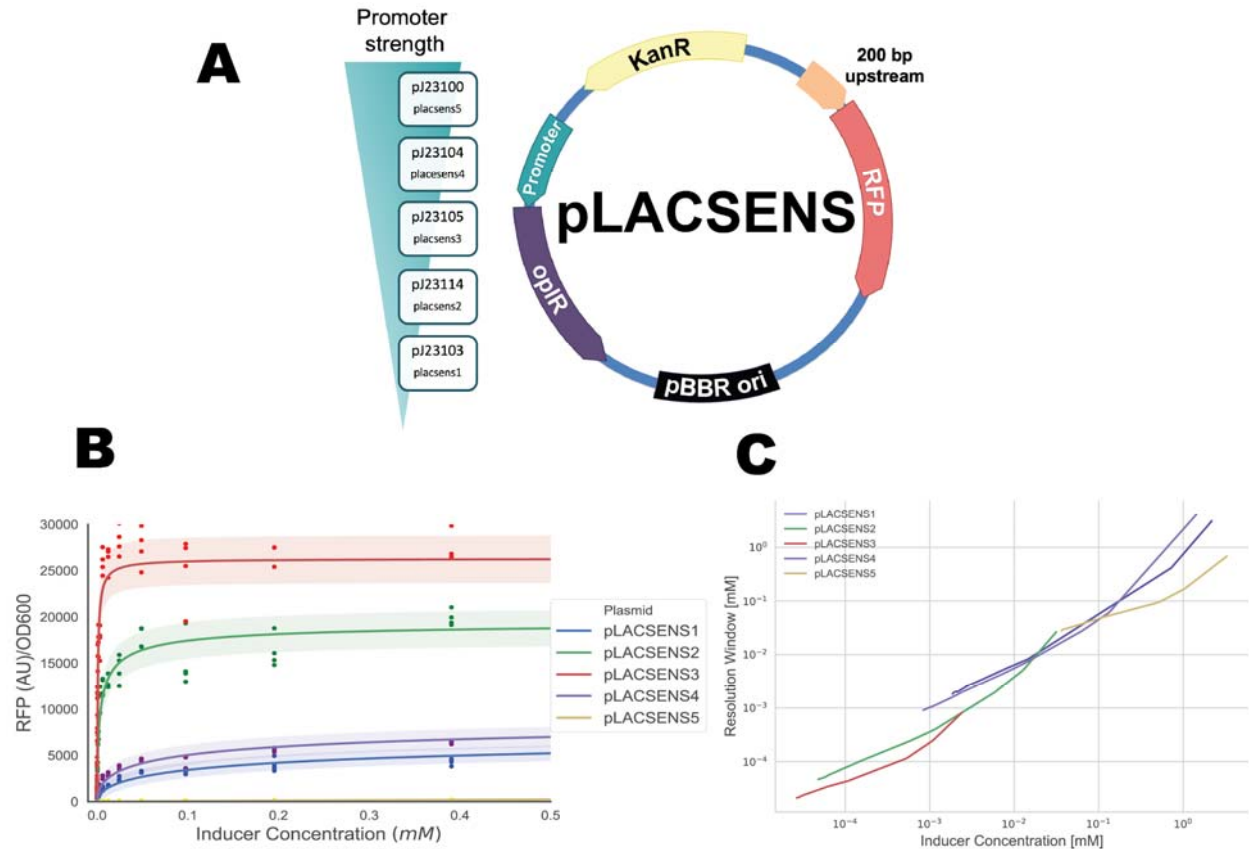

168

169 **Figure 3 - Development of pLACSENS lactam biosensors A) Diagram of the pLACSENS**

170 **vector design, with the relative predicted strength of the promoter driving *opIR* on the left**

171 **B) Fluorescence data fit to the Hill equation to derive biosensor performance**

172 **characteristics for valerolactam against all 5 pLACSENS vectors. Points represent**

173 **individual measurements. Shaded area represents (+/-) one standard deviation, n=4. C)**

174 **Resolution window of each pLACSENS vector over a range of valerolactam concentrations.**

175

176 **Table 2 - One-plasmid biosensor parameters: Max: Predicted maximal RFP, Hill Coef:**

177 **Predicted Hill coefficient,  $K_d$ : Predicted  $K_d$  in mM, Exp. LoD: Limit of detection**

178 **determined experimentally. Induction: maximal induction over background based on**

179 **experimental data.**

180

| Plasmid   | Max            | Hill Coef      | K <sub>d</sub> (mM) | LoD (mM)   | Induction |
|-----------|----------------|----------------|---------------------|------------|-----------|
| pLACSENS1 | 8284 (358)     | 0.54<br>(0.05) | 0.19 (0.05)         | 0.000024   | 253x      |
| pLACSENS2 | 19614<br>(419) | 0.63<br>(0.05) | 0.004<br>(0.0006)   | ≤ 0.000012 | 93x       |
| pLACSENS3 | 26300<br>(390) | 0.90<br>(0.07) | 0.0007<br>(0.0001)  | ≤ 0.000012 | 38x       |
| pLACSENS4 | 9877 (421)     | 0.52<br>(0.05) | 0.09 (0.02)         | 0.000024   | 256x      |
| pLACSENS5 | 793 (25)       | 0.96<br>(0.10) | 1.23 (0.15)         | 0.0015     | 25x       |

181

182

183 OplR is selective for valerolactam and caprolactam

184 To assess lactam specificity of OplR, we measured fluorescence induction of  
185 pLACSENS3 in the presence of lactams (lauro lactam, caprolactam, valerolactam, butyrolactam,  
186 5-oxoproline), ω-amino acids (4-aminobutyrate, 5AVA, 6ACA), the lactone valerolactone, and  
187 piperidine (Figure 4). Robust fluorescence induction was observed with caprolactam,  
188 valerolactam, and 5AVA (Table 3), but no other tested chemicals were capable of induction at  
189 the concentrations tested in the work (data not shown).

190 Given the dissimilarity in chemical structure of 5AVA and lactams, the ability of  
191 pLACSENS3 to detect 5AVA was surprising. Previously it has been shown in *E. coli* that 5AVA  
192 can spontaneously be converted into valerolactam by the activity of native acyl-coA ligases<sup>1</sup>.  
193 This led us to believe that rather than detecting 5AVA, pLACSENS3 was detecting valerolactam  
194 derived from the added 5AVA. LC-TOF analysis revealed that when 1 mM of 5AVA was fed to

195 *E. coli* cultures harboring pLACSENS3 ~600 nM of valerolactam was produced, while no  
 196 valerolactam could be detected in *E. coli* not supplemented with 5AVA (Figure S2).  
 197 Valerolactam concentration at this level would explain the high levels of fluorescence observed  
 198 when 5AVA is added to cultures.  
 199

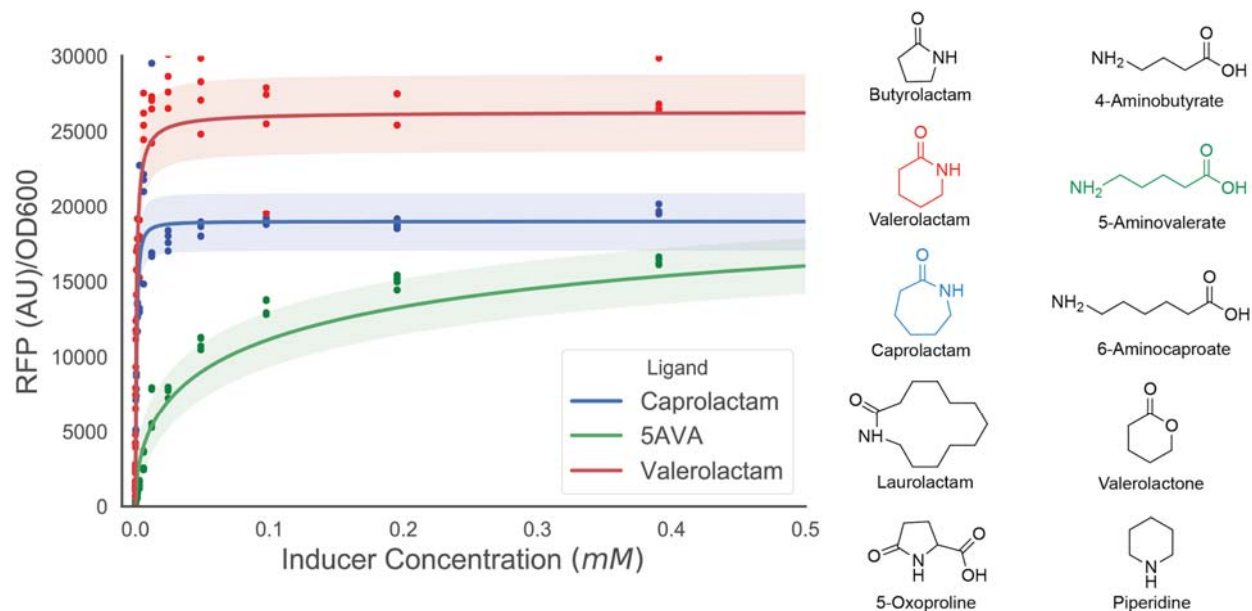

200  
 201 **Figure 4 - Ligand range of pLACSENS3. Fluorescence data fit to the Hill equation to**  
 202 **derive biosensor performance characteristics for ligands that activated pLACSENS3.**  
 203 **Points represent individual measurements. Shaded area represents (+/-) one standard**  
 204 **deviation, n=4. To the right, chemical structures of ligands that were tested.**

205

| Ligand       | Max         | Hill Coef   | K <sub>d</sub> (mM) |
|--------------|-------------|-------------|---------------------|
| Valerolactam | 26300 (390) | 0.90 (0.07) | 0.0007 (0.0001)     |
| Caprolactam  | 18974 (272) | 1.36 (0.14) | 0.0009 (0.0001)     |

|      |              |             |             |
|------|--------------|-------------|-------------|
| 5AVA | 23766 (1093) | 0.52 (0.05) | 0.12 (0.04) |
|------|--------------|-------------|-------------|

206

207 **Table 3 - pLACSENS3 biosensor parameters against different ligands: Max: Predicted**  
208 **maximal RFP, Hill Coef: Predicted Hill coefficient,  $K_d$ : Predicted  $K_d$  in mM.**

209

210 Detection of caprolactam production *in vivo*

211 To demonstrate the utility of *oplR* based systems for metabolic engineering applications  
212 we introduced our most sensitive pLACSENS plasmid (pLACSENS3) into *E. coli* harboring  
213 various acyl-coA ligases on an IPTG-inducible orthogonal plasmid (Figure 5A). Multiple reports  
214 have utilized acyl-coA ligases to cyclize exogenously added 6ACA to produce low titers of  
215 caprolactam, with production ranging from 0.8 - 2 mg/L<sup>1,3</sup>. Strains harboring both plasmids  
216 were grown in LB medium with or without 10 mM 6ACA added for 24 hours. Cells grown in the  
217 presence of 6ACA demonstrated fluorescence greater than cells grown without 6ACA (Figure  
218 5B). LC-MS analysis confirmed that no caprolactam was produced in cells grown without  
219 6ACA, while cells grown with 6ACA had produced 11 ug/L (Figure 6B). The ability of  
220 pLACSENS3 to detect such minute production validates its utility as a means to rapidly and  
221 accurately screen novel pathways for caprolactam production.

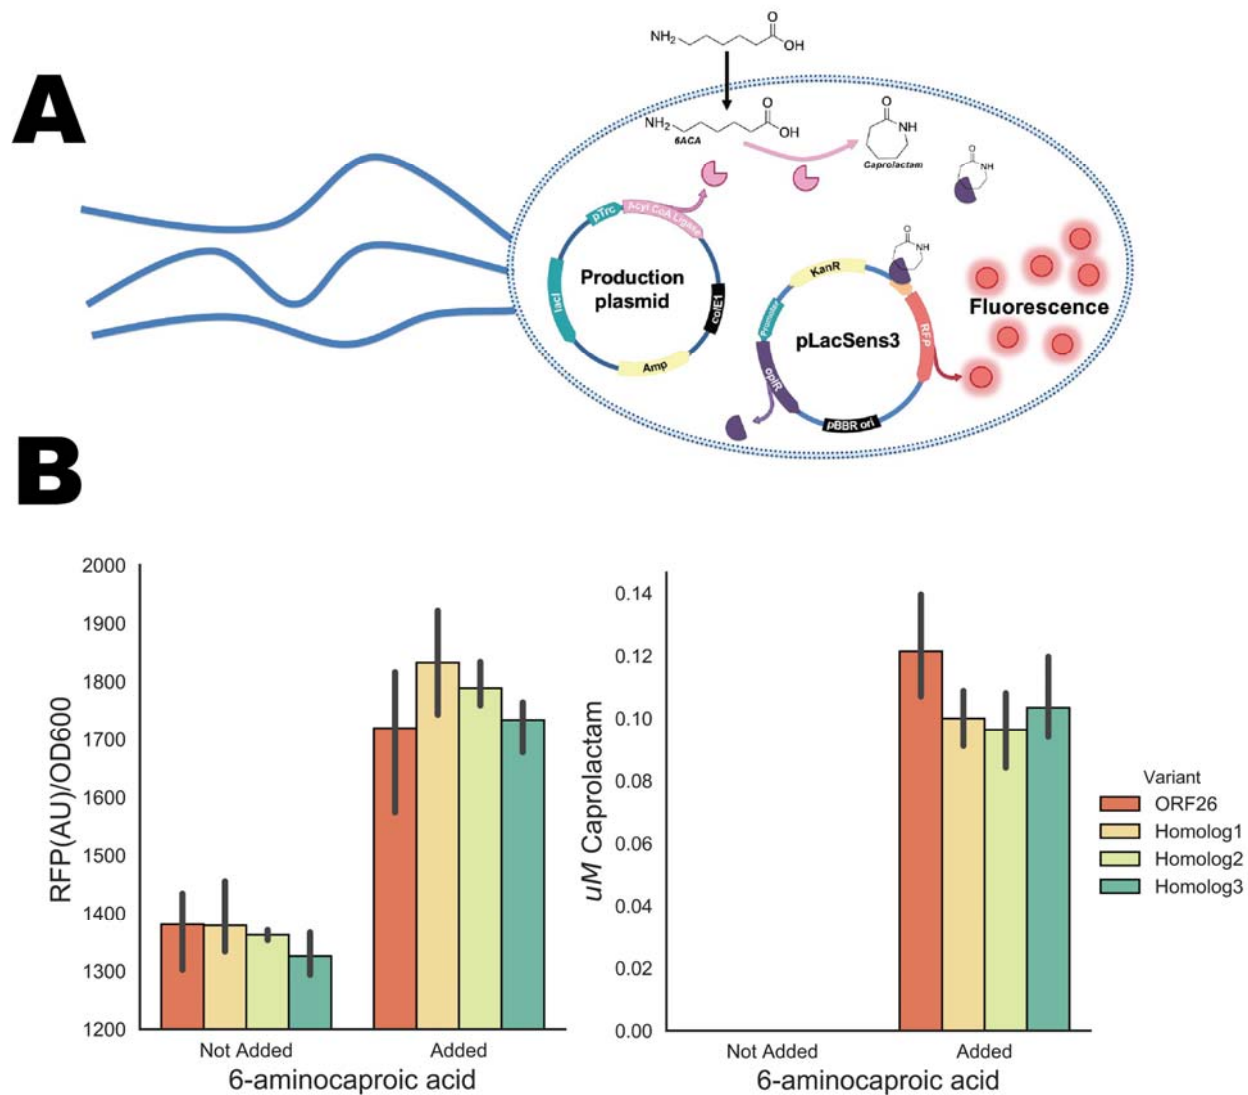

222

223 **Figure 5 - Detection of caprolactam production in *E. coli* via pLACSENS3.** A) Diagram of  
224 the pLACSENS vector design, with the relative predicted strength of the promoter driving  
225 *oplR* on the left B) Fluorescence data fit to the Hill equation to derive biosensor  
226 performance characteristics for valerolactam against all five pLACSENS vectors. Shaded  
227 area represents (+/-) one standard deviation, n=4. Different acyl-CoA ligases were tested  
228 for the *in vivo* cyclization of 6ACA to caprolactam. These included the previously studied

229 **ORF26 CoA-ligase (red) <sup>1</sup> and three additional homologs. Homolog 1 (yellow), Homolog 2**  
230 **(light green) and homolog 3 (dark green).**

231

## 232 **DISCUSSION**

233 Previously, we have leveraged shotgun proteomics to infer local regulation within the  
234 lysine catabolism of *P. putida* <sup>14,19-21</sup>. From these data, multiple glutarate biosensors were  
235 engineered and used to measure relative metabolite amounts in the native host <sup>19</sup>. Here we again  
236 leveraged previously published proteomics data that showed OplBA to be specifically  
237 upregulated in the presence of valerolactam to develop a biosensor <sup>14</sup>. The AraC-family regulator  
238 tentatively named OplR was shown to have limits of detection for exogenously added  
239 valerolactam or caprolactam  $\leq 12$  nM when expressed at particular levels. This is remarkably  
240 more sensitive than the previously published valerolactam and caprolactam sensors, which  
241 showed limits of detection between 10-100  $\mu\text{M}$  <sup>8</sup>. We attribute this high degree of sensitivity to  
242 the fact that, to our knowledge, it is the first sensor to control the catabolism of lactams  
243 specifically.

244 The range of detection of either caprolactam or valerolactam was highly dependent on the  
245 expression of *oplR*, with the  $K_d$  varying from 700 nM to 1.23 mM depending on the constitutive  
246 promoter used to drive expression. Previous work has also demonstrated that the sensing  
247 parameters of transcription factors can be readily modulated by changing the strength of  
248 transcription factor expression <sup>22</sup>. At both the highest and lowest levels of predicted expression  
249 OplR was less sensitive to lactams than when *oplR* was expressed more moderately. This may be  
250 explained by the fact that some AraC-family regulators are known to act as both positive and  
251 negative regulators, thus overexpression of OplR could result in hyper-repression <sup>18</sup>.



252 Unfortunately, insoluble expression of OplR prevented further examination of the biochemical  
253 means of transcriptional control.

254 OplR was shown to be highly specific for valerolactam and caprolactam as ligands, but  
255 not butyrolactam or lauro lactam. These findings are consistent with previous observations that  
256 showed *oplBA* mutants were not defective in their ability to hydrolyze butyrolactam. The  
257 inability of *oplR* to sense the annotated substrate of OplBA, 5-oxoproline, suggests that the  
258 natural function of the amidohydrolase is not that of a 5-oxoprolinase. While the 5-membered  
259 lactam rings tested here were not able to induce OplR-mediated expression, further work should  
260 be conducted to test derivatives of valerolactam and caprolactam. Additional functional groups  
261 added to these lactams could be used to produce both pharmaceutical precursors<sup>23</sup> and polymers  
262 with novel nylon properties. Identifying biological routes to their synthesis is highly attractive.  
263 Furthermore, recent work has shown that directed evolution may also be applied to broaden the  
264 ligand range<sup>24</sup>, which could allow OplR to accommodate different lactam ligands.

265 Current published routes to caprolactam biosynthesis rely on the cyclization of 6ACA via  
266 the activity of promiscuous CoA-ligase activity<sup>1,3</sup>. While *oplR*-based biosensors may be able to  
267 aid in the selection of mutant acyl-coA ligases with enhanced activity, there remains a sizeable  
268 thermodynamic barrier for the cyclization of the 7-membered ring<sup>1</sup>. Novel routes to caprolactam  
269 or naturally occurring caprolactam-containing natural products that can mitigate this barrier  
270 would be ideal for high-level production. For example, a better understanding of pestalactam A-  
271 C biosynthesis may provide new and more efficient chemoenzymatic routes to 7-ring cyclization  
272<sup>25</sup>.

273 In addition to the value of OplR as a biosensor for metabolic engineering purposes, it  
274 may also be useful as an inducible system. Valerolactam is inexpensive (~\$2/gram), and highly

275 water soluble (291 mg/mL). The vector pLACSENS2 demonstrated ~100x induction over  
276 background, with a  $K_d$  toward valerolactam of 4  $\mu$ M, and the second highest maximal expression  
277 of any single vector tested. Additional engineering of the system could improve upon these  
278 qualities. Furthermore, as OplR works well in *E. coli* and is derived from the distantly related *P.*  
279 *putida*, it may work well in other bacterial systems. Future work could evaluate which hosts are  
280 suitable for this inducible system.

281         Since naturally-occurring genetically encoded biosensors for chemicals of interest have  
282 the potential to be much more sensitive than those repurposed or evolved in the laboratory, it is  
283 critical to pursue rapid and efficient means of identifying them. The recent development of other  
284 high-throughput methods to associate genotypes with phenotypes, such as RB-TnSeq and  
285 CRISPRi, has created a large reservoir of data that can be easily mined for transcription factors  
286 useful in synthetic biology<sup>20,26–28</sup>. Bacteria often locally regulate catabolism, thus allowing  
287 inference of genetic control by adjacent transcription factors once a catabolic pathway has been  
288 discovered. Empirical evidence of catabolism is critical for assigning transcription factor  
289 function as orthologous transcription is often utilized differently by different species<sup>29</sup>. Future  
290 work to generalize approaches to develop useful synthetic biology tools from genome-wide  
291 fitness data has the potential to dramatically increase the genetically encoded chemical sensor  
292 space.

293

## 294 **METHODS**

### 295 Media, chemicals, and culture conditions

296         General *E. coli* cultures were grown in Lysogeny Broth (LB) Miller medium (BD  
297 Biosciences, USA) at 37 °C. When indicated, *E. coli* was also grown on EZ-RICH medium

298 (Teknova, Hollister, CA) supplemented with 1% glucose. Cultures were supplemented with  
299 kanamycin (50 mg/L, Sigma Aldrich, USA), or carbenicillin (100mg/L, Sigma Aldrich, USA),  
300 when indicated. All other compounds were purchased through Sigma Aldrich (Sigma Aldrich,  
301 USA) .

### 302 Strains and plasmids

303 All bacterial strains and plasmids used in this work are listed in Table 4. All strains and  
304 plasmids created in this work are available through the public instance of the JBEI registry.  
305 (<https://public-registry.jbei.org/folders/XXX>). All plasmids were designed using Device Editor  
306 and Vector Editor software, while all primers used for the construction of plasmids were  
307 designed using j5 software<sup>30-32</sup>. Plasmids were assembled via Gibson Assembly using standard  
308 protocols<sup>33</sup>, or Golden Gate Assembly using standard protocols<sup>34</sup>. Plasmids were routinely  
309 isolated using the Qiaprep Spin Miniprep kit (Qiagen, USA), and all primers were purchased  
310 from Integrated DNA Technologies (IDT, Coralville, IA).

### 311 Expression and purification of proteins

312 Proteins were purified as described previously<sup>35</sup>. The cultures were grown at 37 °C  
313 until the OD<sub>600</sub> nm reached 0.8 and cooled on ice for 20 min. 1 mM IPTG was added to induce  
314 overexpression for 16 h at 18 °C. The cells were harvested by centrifugation (8000g, 10 min, 4  
315 °C), resuspended in 40 mL of lysis buffer (50 mM HEPES, pH 8.0, 0.3 M NaCl, 10% glycerol  
316 (v/v) and 10 mM imidazole), and lysed by sonication on ice. Cellular debris was removed by  
317 centrifugation (20000g, 60 min, 4 °C).

318 The supernatant was applied to a fritted column containing Ni-NTA resin (Qiagen, USA)  
319 and the proteins were purified using the manufacturer's instructions. Fractions were collected  
320 and analyzed via SDS-PAGE.

321 Fluorescence biosensor assays

322 All assays were conducted in 96-deep well plates (Corning Costar, 3960), with each well  
323 containing 500  $\mu$ L of medium with appropriate ligands, antibiotics, and/or inducers inoculated at  
324 1% v/v from overnight cultures. Plates were sealed with AeraSeal film (Excel Scientific,  
325 AC1201-02 and incubated at 37 C in a 250 rpm shaker rack. After 24 hours, 100  $\mu$ L from each  
326 well was aliquoted into a black, clear-bottom 96-well plate for measurements of optical density  
327 and fluorescence using an Infinite F200 (Tecan Life Sciences, San Jose, CA) plate reader.  
328 Optical density was measured at 600 nm ( $OD_{600}$ ), while fluorescence was measured using an  
329 excitation wavelength of 535 nm, an emission wavelength of 620 nm, and a manually set gain of  
330 60.

331 For the checkerboard assay of the two-plasmid system, LB medium supplemented with  
332 both kanamycin and carbenicillin was inoculated with E. coli containing the regulator and  
333 reporter plasmids grown overnight in the same medium. Arabinose concentration was decreased  
334 from 0.2 to 0% w/v along the y-axis, while valerolactam concentration was increased from 0-10  
335 mM along the x-axis.

336 To find the Hill fit to the two-plasmid system, EZ-RICH medium containing kanamycin,  
337 carbenicillin, and 0.0125 w/v% arabinose was inoculated with an overnight culture of the two-  
338 plasmid system in LB medium supplemented with both kanamycin and carbenicillin. Both  
339 valerolactam and caprolactam were tested at concentrations ranging from 0 to 50 mM.

340 Characterization of the 5 variations of the one-plasmid pLACSENS plasmids was  
341 conducted using EZ-rich medium containing kanamycin and inoculated with overnight cultures  
342 of the appropriate E. coli strain. Valerolactam concentrations was varied from 0 to 50 mM. This  
343 same assay was repeated on pLACSENS3 with various ligands—using concentrations between 0

344 to 50 mM of caprolactam and 5AVA, and 0 to 10 mM of butyrolactam, 5-oxoproline, gamma-  
345 aminobutyric acid, 6ACA, valerolactone, and piperidine. The maximum concentration of  
346 lauro lactam tested was 0.1 mM due to its poor solubility.

#### 347 Production assays and analytical methods

348 Caprolactam production assays were carried out in 10 mL of LB medium supplemented with 10  
349 mM 6ACA, as well as kanamycin, carbenicillin, and 1 mM IPTG. Cultures were inoculated  
350 1:100 with overnight culture harboring both pLACSENS3 and expression vectors for acyl-coA  
351 ligases and grown at 30 °C shaking at 200 rpm for 24 hours. After 24 hours optical density was  
352 measured at 600 nm (OD<sub>600</sub>), while fluorescence was measured using an excitation wavelength  
353 of 535 nm, an emission wavelength of 620 nm, and a manually set gain of 60. To sample for  
354 caprolactam production 200 µL of culture was quenched with an equal volume of ice-cold  
355 methanol and then stored at -20 °C until analysis. The different acyl-CoA ligases tested for the *in*  
356 *vivo* cyclization of 6ACA to caprolactam included the previously studied ORF26 CoA-ligase  
357 (red)<sup>1</sup> and three additional homologs. Homolog 1 refers to A0A0D4DX08\_9ACTN, homolog 2  
358 refers to G2NX2\_STRVO and homolog 3 refers to A0A0C1VDH3\_9ACTN.

359  
360 Valerolactam and caprolactam were measured via LC-QTOF-MS as described  
361 previously<sup>14</sup>. Liquid chromatographic separation was conducted at 20°C with a Kinetex HILIC  
362 column (50-mm length, 4.6-mm internal diameter, 2.6-µm particle size; Phenomenex, Torrance,  
363 CA) using a 1260 Series HPLC system (Agilent Technologies, Santa Clara, CA, USA). The  
364 injection volume for each measurement was 5 µL. The mobile phase was composed of 10 mM  
365 ammonium formate and 0.07% formic acid in water (solvent A) and 10 mM ammonium formate  
366 and 0.07% formic acid in 90% acetonitrile and 10% water (solvent B) (HPLC grade, Honeywell

367 Burdick & Jackson, CA, USA). High purity ammonium formate and formic acid (98-100%  
368 chemical purity) were purchased from Sigma-Aldrich, St. Louis, MO, USA. Lactams were  
369 separated with the following gradient: decreased from 90%B to 70%B in 2 min, held at 70%B  
370 for 0.75 min, decreased from 70%B to 40%B in 0.25 min, held at 40%B for 1.25 min, increased  
371 from 40%B to 90%B for 0.25 min, held at 90%B for 1 min. The flow rate was varied as follows:  
372 0.6 mL/min for 3.25 min, increased from 0.6 mL/min to 1 mL/min in 0.25 min, and held at 1  
373 mL/min for 2 min. The total run time was 5.5 min.

374 The HPLC system was coupled to an Agilent Technologies 6520 quadrupole time-of-  
375 flight mass spectrometer (QTOF MS) with a 1:6 post-column split. Nitrogen gas was used as  
376 both the nebulizing and drying gas to facilitate the production of gas-phase ions. The drying and  
377 nebulizing gases were set to 12 L/min and 30 lb/in<sup>2</sup>, respectively, and a drying gas temperature  
378 of 350°C was used throughout. Fragmentor, skimmer and OCT 1 RF voltages were set to 100 V,  
379 50 V and 300 V, respectively. Electrospray ionization (ESI) was conducted in the positive-ion  
380 mode for the detection of [M + H]<sup>+</sup> ions with a capillary voltage of 4000 V. The collision energy  
381 voltage was set to

382 0 V. MS experiments were carried out in the full-scan mode (75–1100 *m/z*) at 0.86  
383 spectra/s. The QTOF-MS system was tuned with the Agilent ESI-L Low concentration tuning  
384 mix in the range of 50-1700 *m/z*. Lactams were quantified by comparison with 8-point  
385 calibration curves of authentic chemical standards from 0.78125 µM to 100 µM. R<sup>2</sup> coefficients  
386 of ≥0.99[EB1] were achieved for the calibration curves. Data acquisition was performed by  
387 Agilent MassHunter Workstation (version B.05.00), qualitative assessment by Agilent  
388 MassHunter Qualitative Analysis (version B.05.00 or B.06.00), and data curation by Agilent  
389 Profinder (version B.08.00)

## 390 Bioinformatic Analysis

391 For the phylogenetic reconstructions, the best amino acid substitution model was selected  
392 using ModelFinder as implemented on IQ-tree<sup>36</sup> phylogenetic trees were constructed using IQ-  
393 tree, nodes were supported with 10,000 bootstrap replicates. The final tree figures were edited  
394 using FigTree v1.4.3 (<http://tree.bio.ed.ac.uk/software/figtree/>). Orthologous syntenic regions of  
395 OplBA were identified with CORASON-BGC<sup>37</sup> and manually colored and annotated. DNA-  
396 binding sites were predicted with MEME<sup>16</sup>.

## 397 Analysis of Biosensor Performance

398 Fluorescent measurements were fit to the Hill equation and biosensor parameters were  
399 estimated as described previously<sup>19</sup>. Briefly, fluorescent values were OD<sub>600</sub> normalized, and had  
400 their background fluorescent subtracted. A probabilistic model relating inducer concentrations  
401 ( $C$ ) and fluorescence measurements ( $F$ ) to characterize the performance of a biosensor was used  
402 where  $F$  :

$$403 \quad P(F|C, \theta, \alpha) = \mathcal{N}(h_{\theta}(C), \sigma)$$

404 where  $h_{\theta}$  is the Hill function,  $\theta$  are the parameters of the hill function,  $\sigma$  is the estimated  
405 standard deviation, and  $\mathcal{N}$  represents a gaussian (normal) distribution. Using the probabilistic  
406 model which captures our constraints on the problem the log likelihood function is expressed as:

$$407 \quad \ell(\theta, \sigma|D) = \sum_{i=1}^N \log P(F = f_i|C = c_i, \sigma, \theta).$$

408 The log likelihood is used to express the maximum likelihood estimation (MLE) problem:

$$409 \quad \hat{\theta}, \hat{\sigma} = \arg \max_{\theta, \sigma} \ell(\theta, \sigma|D)$$

410 which when solved results in the optimal parameters of the model given the characterization  
411 data. In order to estimate the distribution of ligand concentrations that are compatible with



412 experimental fluorescence data, MCMC sampling was used to solve the following MLE  
413 problem:

$$414 \quad \hat{c} = \arg \max_c \sum_{i=1}^N \log P(F = f_i | C = c, \hat{\theta}, \hat{\sigma})$$

415 We determined biosensor resolution by solving the above maximum likelihood estimation  
416 problem iteratively over the range of observed fluorescences during the biosensor  
417 characterization process. This can determine the relationship between an inducer concentration  
418 estimate and the estimated standard deviation. The standard deviation of the estimate of inducer  
419 concentration can be interpreted as the resolution window. Here, two standard deviations is  
420 considered the resolution window of the sensor, as 95% of the compatible inducer concentration  
421 estimates fall within the interval .

422 Induction above background was calculated by dividing the maximal experimental  
423 normalized RFP expression by background fluorescence in uninduced cultures. The experimental  
424 limit of detection was defined as the minimal concentration of inducer that produced normalized  
425 fluorescence that was statistically above uninduced cultures harboring the same plasmid via  
426 Student's t-test ( $p < 0.05$ ) .

## 427 **Acknowledgements**

428 We would like to thank the Koret Research Scholars Program for providing funding to  
429 ANP to conduct summer research. This work was part of the DOE Joint BioEnergy Institute  
430 (<https://www.jbei.org>) supported by the U. S. Department of Energy, Office of Science, Office of  
431 Biological and Environmental Research, supported by the U.S. Department of Energy, Energy  
432 Efficiency and Renewable Energy, Bioenergy Technologies Office, through contract DE-AC02-  
433 05CH11231 between Lawrence Berkeley National Laboratory and the U.S. Department of

434 Energy. The views and opinions of the authors expressed herein do not necessarily state or  
435 reflect those of the United States Government or any agency thereof. Neither the United States  
436 Government nor any agency thereof, nor any of their employees, makes any warranty, expressed  
437 or implied, or assumes any legal liability or responsibility for the accuracy, completeness, or  
438 usefulness of any information, apparatus, product, or process disclosed, or represents that its use  
439 would not infringe privately owned rights. The United States Government retains and the  
440 publisher, by accepting the article for publication, acknowledges that the United States  
441 Government retains a nonexclusive, paid-up, irrevocable, worldwide license to publish or  
442 reproduce the published form of this manuscript, or allow others to do so, for United States  
443 Government purposes. The Department of Energy will provide public access to these results of  
444 federally sponsored research in accordance with the DOE Public Access Plan  
445 (<http://energy.gov/downloads/doe-public-access-plan>). HGM was also supported by the Basque  
446 Government through the BERC 2018-2021 program and by Spanish Ministry of Economy and  
447 Competitiveness MINECO: BCAM Severo Ochoa excellence accreditation SEV-2017-0718.

448

#### 449 **Contributions**

450 Conceptualization, M.G.T.; Methodology, M.G.T.,A.N.P.,J.F.B, P.C.M.,E.E.K.B.,N.S,Z.C.;

451 Investigation, M.G.T., L.E.V., J.F.B, P.C.M, M.R.I.,M.E.G.,A.N.P., ; Writing – Original Draft,

452 M.G.T.; Writing – Review and Editing, All authors.; Resources and supervision,

453 H.G.M,A.M.,J.D.K.

454 **Competing Interests**

455 J.D.K. has financial interests in Amyris, Lygos, Constructive Biology, Demetrix, Napigen and  
456 Maple Bio.

457 **Supplementary Figures**

458 **Figure S1: Insolubility of OplR expressed heterologously in *E. coli*: OplR-6xHis expressed**  
459 **in the insoluble fraction (~40 kD) of *E. coli* in the presence and absence of the detergent**  
460 **Tween 20 (0.5% w/v).**

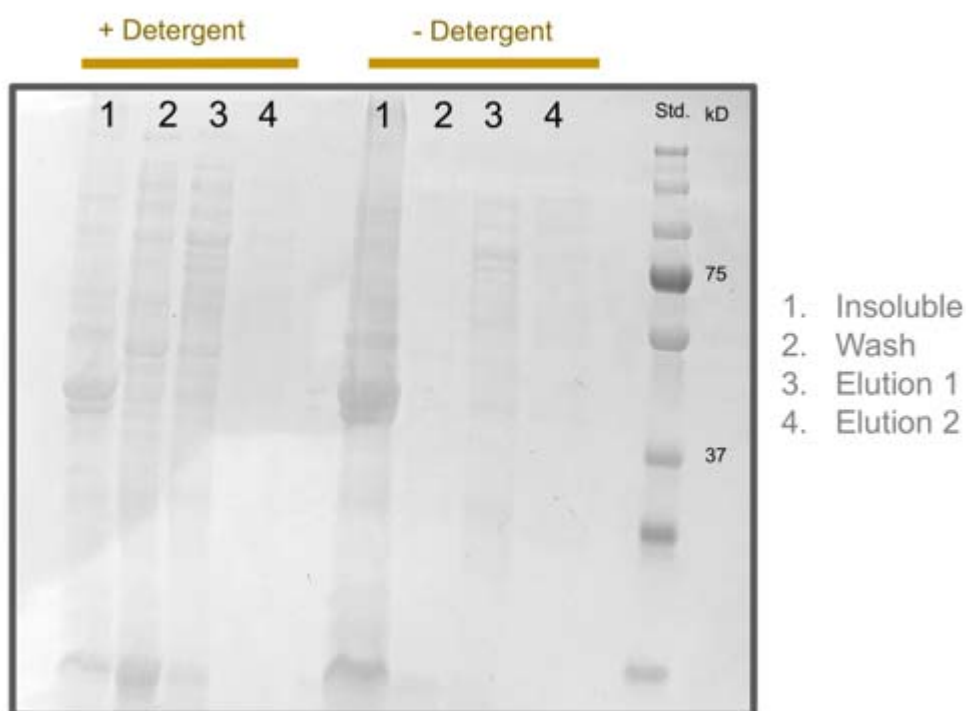

461

462

463 **Figure S2: Valerolactam produced from 5AVA in *E. coli* culture. Bars show the amount of**  
464 **valerolactam produced in *E. coli* harboring pLACSENS3 when fed either 1 mM or 0 mM**  
465 **5AVA. Error bars represent 95% cI.**

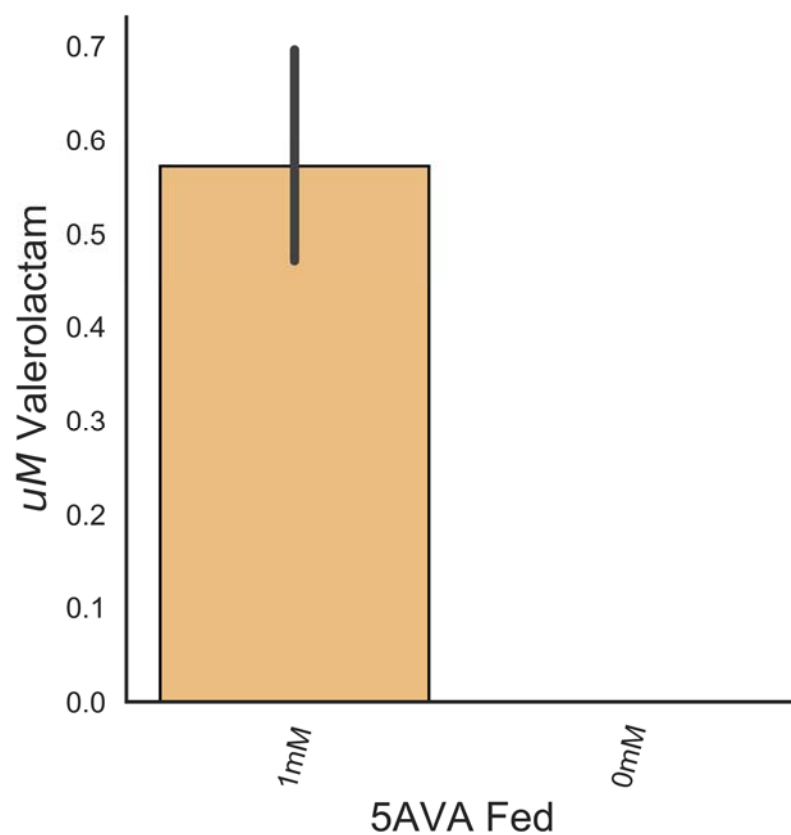

466

467

468 **Table 4: Strains and plasmids used in this study**

| Strain               | JBEI Part ID | Reference |
|----------------------|--------------|-----------|
| <i>E. coli</i> DH10B |              | 38        |

|                         |             |               |
|-------------------------|-------------|---------------|
| E. coli BL21(DE3)       |             | Novagen       |
| P. putida KT2440        |             | ATCC 47054    |
| <b>Plasmids</b>         |             |               |
| pBADT                   |             | <sup>39</sup> |
| pBADT-PP_3516p-RFP      | JBEI-104519 | This work     |
| pBbA8a-PP_3516          | JBEI-104517 | This work     |
| pLacSens1               | JBEI-104506 | This work     |
| pLacSens2               | JBEI-104505 | This work     |
| pLacSens3               | JBEI-104504 | This work     |
| pLacSens4               | JBEI-104503 | This work     |
| pLacSens5               | JBEI-104502 | This work     |
| pBbE7a-ORF26            | JBEI-104322 | This work     |
| pBbE7a-G2NX2_STRVO      | JBEI-104323 | This work     |
| pBbE7a-A0A0D4DX08_9ACTN | JBEI-104324 | This work     |
| pBbE7a-A0A0C1VDH3_9ACTN | JBEI-104325 | This work     |

469

470 Bibliography

- 471 (1) Zhang, J., Barajas, J. F., Burdu, M., Wang, G., Baidoo, E. E., and Keasling, J. D. (2017)  
472 Application of an Acyl-CoA Ligase from *Streptomyces aizunensis* for Lactam Biosynthesis. *ACS*  
473 *Synth. Biol.* 6, 884–890.  
474 (2) Thomas, J. M., and Raja, R. (2005) Design of a “green” one-step catalytic production of  
475 epsilon-caprolactam (precursor of nylon-6). *Proc Natl Acad Sci USA* 102, 13732–13736.

- 476 (3) Chae, T. U., Ko, Y.-S., Hwang, K.-S., and Lee, S. Y. (2017) Metabolic engineering of  
477 *Escherichia coli* for the production of four-, five- and six-carbon lactams. *Metab. Eng.* 41, 82–91.
- 478 (4) Zhang, J., Barajas, J. F., Burdu, M., Ruegg, T. L., Dias, B., and Keasling, J. D. (2017)  
479 Development of a Transcription Factor-Based Lactam Biosensor. *ACS Synth. Biol.* 6, 439–445.
- 480 (5) Casadei, M. A., Galli, C., and Mandolini, L. (1984) Ring-closure reactions. 22. Kinetics of  
481 cyclization of diethyl ( $\omega$ -bromoalkyl)malonates in the range of 4- to 21-membered rings.  
482 Role of ring strain. *J. Am. Chem. Soc.* 106, 1051–1056.
- 483 (6) Dietrich, J. A., McKee, A. E., and Keasling, J. D. (2010) High-throughput metabolic  
484 engineering: advances in small-molecule screening and selection. *Annu. Rev. Biochem.* 79, 563–  
485 590.
- 486 (7) Jang, S., Jang, S., Im, D.-K., Kang, T. J., Oh, M.-K., and Jung, G. Y. (2019) Artificial  
487 caprolactam-specific riboswitch as an intracellular metabolite sensor. *ACS Synth. Biol.*
- 488 (8) Yeom, S.-J., Kim, M., Kwon, K. K., Fu, Y., Rha, E., Park, S.-H., Lee, H., Kim, H., Lee, D.-  
489 H., Kim, D.-M., and Lee, S.-G. (2018) A synthetic microbial biosensor for high-throughput  
490 screening of lactam biocatalysts. *Nat. Commun.* 9, 5053.
- 491 (9) Iwaki, H., Hasegawa, Y., Teraoka, M., Tokuyama, T., Bergeron, H., and Lau, P. C. (1999)  
492 Identification of a transcriptional activator (ChnR) and a 6-oxohexanoate dehydrogenase (ChnE)  
493 in the cyclohexanol catabolic pathway in *Acinetobacter* sp. Strain NCIMB 9871 and localization  
494 of the genes that encode them. *Appl. Environ. Microbiol.* 65, 5158–5162.
- 495 (10) Steigedal, M., and Valla, S. (2008) The *Acinetobacter* sp. *chnB* promoter together with its  
496 cognate positive regulator ChnR is an attractive new candidate for metabolic engineering  
497 applications in bacteria. *Metab. Eng.* 10, 121–129.
- 498 (11) Komeda, H., Hori, Y., Kobayashi, M., and Shimizu, S. (1996) Transcriptional regulation of  
499 the *Rhodococcus rhodochrous* J1 *nitA* gene encoding a nitrilase. *Proc Natl Acad Sci USA* 93,  
500 10572–10577.
- 501 (12) Pandey, A. K., Raman, S., Proff, R., Joshi, S., Kang, C.-M., Rubin, E. J., Husson, R. N., and  
502 Sasseti, C. M. (2009) Nitrile-inducible gene expression in mycobacteria. *Tuberculosis (Edinb)*  
503 89, 12–16.
- 504 (13) Otzen, M., Palacio, C., and Janssen, D. B. (2018) Characterization of the caprolactam  
505 degradation pathway in *Pseudomonas jessenii* using mass spectrometry-based proteomics. *Appl.*  
506 *Microbiol. Biotechnol.* 102, 6699–6711.
- 507 (14) Thompson, M., Valencia, L. E., Blake-Hedges, J., Cruz-Morales, P., Velasquez, A.,  
508 Pearson, A., Sermeno, L., Sharpless, W., Benites, V., Chen, Y., Baidoo, E., Petzold, C. J.,  
509 Deutschbauer, A., and Keasling, J. D. (2019) Host engineering for improved valerolactam  
510 production in *Pseudomonas putida*. *BioRxiv*.
- 511 (15) Wetmore, K. M., Price, M. N., Waters, R. J., Lamson, J. S., He, J., Hoover, C. A., Blow, M.  
512 J., Bristow, J., Butland, G., Arkin, A. P., and Deutschbauer, A. (2015) Rapid quantification of  
513 mutant fitness in diverse bacteria by sequencing randomly bar-coded transposons. *MBio* 6,  
514 e00306-15.
- 515 (16) Bailey, T. L., Williams, N., Mischel, C., and Li, W. W. (2006) MEME: discovering and

- 516 analyzing DNA and protein sequence motifs. *Nucleic Acids Res.* 34, W369-73.
- 517 (17) Porter, M. E., and Dorman, C. J. (2002) In vivo DNA-binding and oligomerization  
518 properties of the *Shigella flexneri* AraC-like transcriptional regulator VirF as identified by  
519 random and site-specific mutagenesis. *J. Bacteriol.* 184, 531–539.
- 520 (18) Schleif, R. (2010) AraC protein, regulation of the l-arabinose operon in *Escherichia coli*,  
521 and the light switch mechanism of AraC action. *FEMS Microbiol. Rev.* 34, 779–796.
- 522 (19) Thompson, M. G., Cruz-Morales, P., Krishna, R. N., Blake-Hedges, J. M., Incha, M. R., and  
523 Keasling, J. D. (2019) Glutarate metabolism in *Pseudomonas putida* is regulated by two distinct  
524 glutarate sensing transcription factors. *BioRxiv*.
- 525 (20) Thompson, M. G., Blake-Hedges, J. M., Cruz-Morales, P., Barajas, J. F., Curran, S. C.,  
526 Eiben, C. B., Harris, N. C., Benites, V. T., Gin, J. W., Sharpless, W. A., Twigg, F. F., Skyrud,  
527 W., Krishna, R. N., Henrique Pereira, J., Baidoo, E. E. K., Petzold, C. J., Adams, P. D., Arkin, A.  
528 P., Deutschbauer, A. M., and Keasling, J. D. (2019) Massively Parallel Fitness Profiling Reveals  
529 Multiple Novel Enzymes in *Pseudomonas putida* Lysine Metabolism. *MBio* 10.
- 530 (21) Chen, Y., Vu, J., Thompson, M. G., Sharpless, W. A., Chan, L. J. G., Gin, J. W., Keasling,  
531 J. D., Adams, P. D., and Petzold, C. J. (2019) A rapid methods development workflow for high-  
532 throughput quantitative proteomic applications. *PLoS ONE* 14, e0211582.
- 533 (22) Rogers, J. K., Guzman, C. D., Taylor, N. D., Raman, S., Anderson, K., and Church, G. M.  
534 (2015) Synthetic biosensors for precise gene control and real-time monitoring of metabolites.  
535 *Nucleic Acids Res.* 43, 7648–7660.
- 536 (23) Thai, K., Wang, L., Dudding, T., Bilodeau, F., and Gravel, M. (2010) NHC-catalyzed  
537 intramolecular redox amidation for the synthesis of functionalized lactams. *Org. Lett.* 12, 5708–  
538 5711.
- 539 (24) Kasey, C. M., Zerrad, M., Li, Y., Cropp, T. A., and Williams, G. J. (2018) Development of  
540 Transcription Factor-Based Designer Macrolide Biosensors for Metabolic Engineering and  
541 Synthetic Biology. *ACS Synth. Biol.* 7, 227–239.
- 542 (25) Davis, R. A., Carroll, A. R., Andrews, K. T., Boyle, G. M., Tran, T. L., Healy, P. C.,  
543 Kalaitzis, J. A., and Shivas, R. G. (2010) Pestalactams A-C: novel caprolactams from the  
544 endophytic fungus *Pestalotiopsis* sp. *Org. Biomol. Chem.* 8, 1785–1790.
- 545 (26) Wang, T., Guan, C., Guo, J., Liu, B., Wu, Y., Xie, Z., Zhang, C., and Xing, X.-H. (2018)  
546 Pooled CRISPR interference screening enables genome-scale functional genomics study in  
547 bacteria with superior performance. *Nat. Commun.* 9, 2475.
- 548 (27) Price, M. N., Wetmore, K. M., Waters, R. J., Callaghan, M., Ray, J., Liu, H., Kuehl, J. V.,  
549 Melnyk, R. A., Lamson, J. S., Suh, Y., Carlson, H. K., Esquivel, Z., Sadeeshkumar, H.,  
550 Chakraborty, R., Zane, G. M., Rubin, B. E., Wall, J. D., Visel, A., Bristow, J., Blow, M. J., and  
551 Deutschbauer, A. M. (2018) Mutant phenotypes for thousands of bacterial genes of unknown  
552 function. *Nature* 557, 503–509.
- 553 (28) Sagawa, S., Price, M. N., Deutschbauer, A. M., and Arkin, A. P. (2017) Validating  
554 regulatory predictions from diverse bacteria with mutant fitness data. *PLoS ONE* 12, e0178258.
- 555 (29) Price, M. N., Dehal, P. S., and Arkin, A. P. (2007) Orthologous transcription factors in



- 556 bacteria have different functions and regulate different genes. *PLoS Comput. Biol.* *3*, 1739–1750.
- 557 (30) Ham, T. S., Dmytriv, Z., Plahar, H., Chen, J., Hillson, N. J., and Keasling, J. D. (2012)
- 558 Design, implementation and practice of JBEI-ICE: an open source biological part registry
- 559 platform and tools. *Nucleic Acids Res.* *40*, e141.
- 560 (31) Chen, J., Densmore, D., Ham, T. S., Keasling, J. D., and Hillson, N. J. (2012) DeviceEditor
- 561 visual biological CAD canvas. *J. Biol. Eng.* *6*, 1.
- 562 (32) Hillson, N. J., Rosengarten, R. D., and Keasling, J. D. (2012) j5 DNA assembly design
- 563 automation software. *ACS Synth. Biol.* *1*, 14–21.
- 564 (33) Gibson, D. G., Young, L., Chuang, R.-Y., Venter, J. C., Hutchison, C. A., and Smith, H. O.
- 565 (2009) Enzymatic assembly of DNA molecules up to several hundred kilobases. *Nat. Methods* *6*,
- 566 343–345.
- 567 (34) Engler, C., Kandzia, R., and Marillonnet, S. (2008) A one pot, one step, precision cloning
- 568 method with high throughput capability. *PLoS ONE* *3*, e3647.
- 569 (35) Jackson, D. R., Tu, S. S., Nguyen, M., Barajas, J. F., Schaub, A. J., Krug, D., Pistorius, D.,
- 570 Luo, R., Müller, R., and Tsai, S.-C. (2016) Structural Insights into Anthranilate Priming during
- 571 Type II Polyketide Biosynthesis. *ACS Chem. Biol.* *11*, 95–103.
- 572 (36) Kalyaanamoorthy, S., Minh, B. Q., Wong, T. K. F., von Haeseler, A., and Jermin, L. S.
- 573 (2017) ModelFinder: fast model selection for accurate phylogenetic estimates. *Nat. Methods* *14*,
- 574 587–589.
- 575 (37) Cruz-Morales, P., Ramos-Aboites, H. E., Licona-Cassani, C., Selem-Mójica, N., Mejía-
- 576 Ponce, P. M., Souza-Saldívar, V., and Barona-Gómez, F. (2017) Actinobacteria phylogenomics,
- 577 selective isolation from an iron oligotrophic environment and siderophore functional
- 578 characterization, unveil new desferrioxamine traits. *FEMS Microbiol. Ecol.* *93*.
- 579 (38) Grant, S. G., Jessee, J., Bloom, F. R., and Hanahan, D. (1990) Differential plasmid rescue
- 580 from transgenic mouse DNAs into *Escherichia coli* methylation-restriction mutants. *Proc Natl*
- 581 *Acad Sci USA* *87*, 4645–4649.
- 582 (39) Bi, C., Su, P., Müller, J., Yeh, Y.-C., Chhabra, S. R., Beller, H. R., Singer, S. W., and
- 583 Hillson, N. J. (2013) Development of a broad-host synthetic biology toolbox for *Ralstonia*
- 584 *eutropha* and its application to engineering hydrocarbon biofuel production. *Microb. Cell Fact.*
- 585 *12*, 107.
